# Supplementary material for: Development and Evaluation of 2-Amino-7-Fluorophenazine 5,10-Dioxide Polymeric Micelles as Antitumoral Agents for 4T1 Breast Cancer
Source: Polymers (Basel). 2021 Dec 25;14(1):71. doi: 10.3390/polym14010071 (PMC8747360; doi:10.3390/polym14010071)
Supplement: Supplementary file 1 [file polymers-14-00071-s001.zip › polymers-1477558-supplementary.pdf]

# SUPPLEMENTARY MATERIAL

## Development and Evaluation of 2-Amino-7-Fluorophenazine 5,10-Dioxide Polymeric Micelles as Antitumoral Agents for 4T1 Breast Cancer

Nicole Lecot, Belén Dávila, Carina Sánchez, Marcelo Fernández, Mercedes González, Pablo Cabral, Hugo Cerecetto and Romina Glisoni

|                                                                                                                                                                            |       |        |
|----------------------------------------------------------------------------------------------------------------------------------------------------------------------------|-------|--------|
| <b>Figure S1.</b> Linear average calibration curve of FNZ, in DMSO measuring at 296 nm. The curve was determined in triplicate (three independent samples, $R^2=0.9911$ ). | ..... | page 1 |
| <b>Figure S2.</b> Plots of average size distributions obtained by DLS using Zetasizer family software v7.12.                                                               | ..... | page 2 |
| <b>Figure S3.</b> Plots of average size distributions obtained by TEM using FIJI platform analysis software.                                                               | ..... | page 3 |

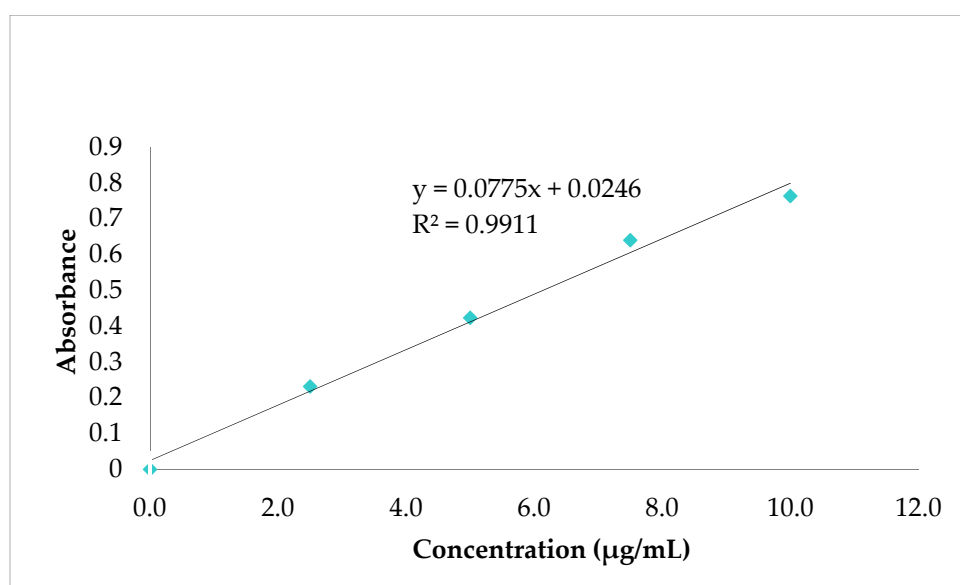

**Figure S1.** Linear average calibration curve of FNZ, in DMSO measuring at 296 nm. The curve was determined in triplicate (three independent samples,  $R^2 = 0.9911$ ).

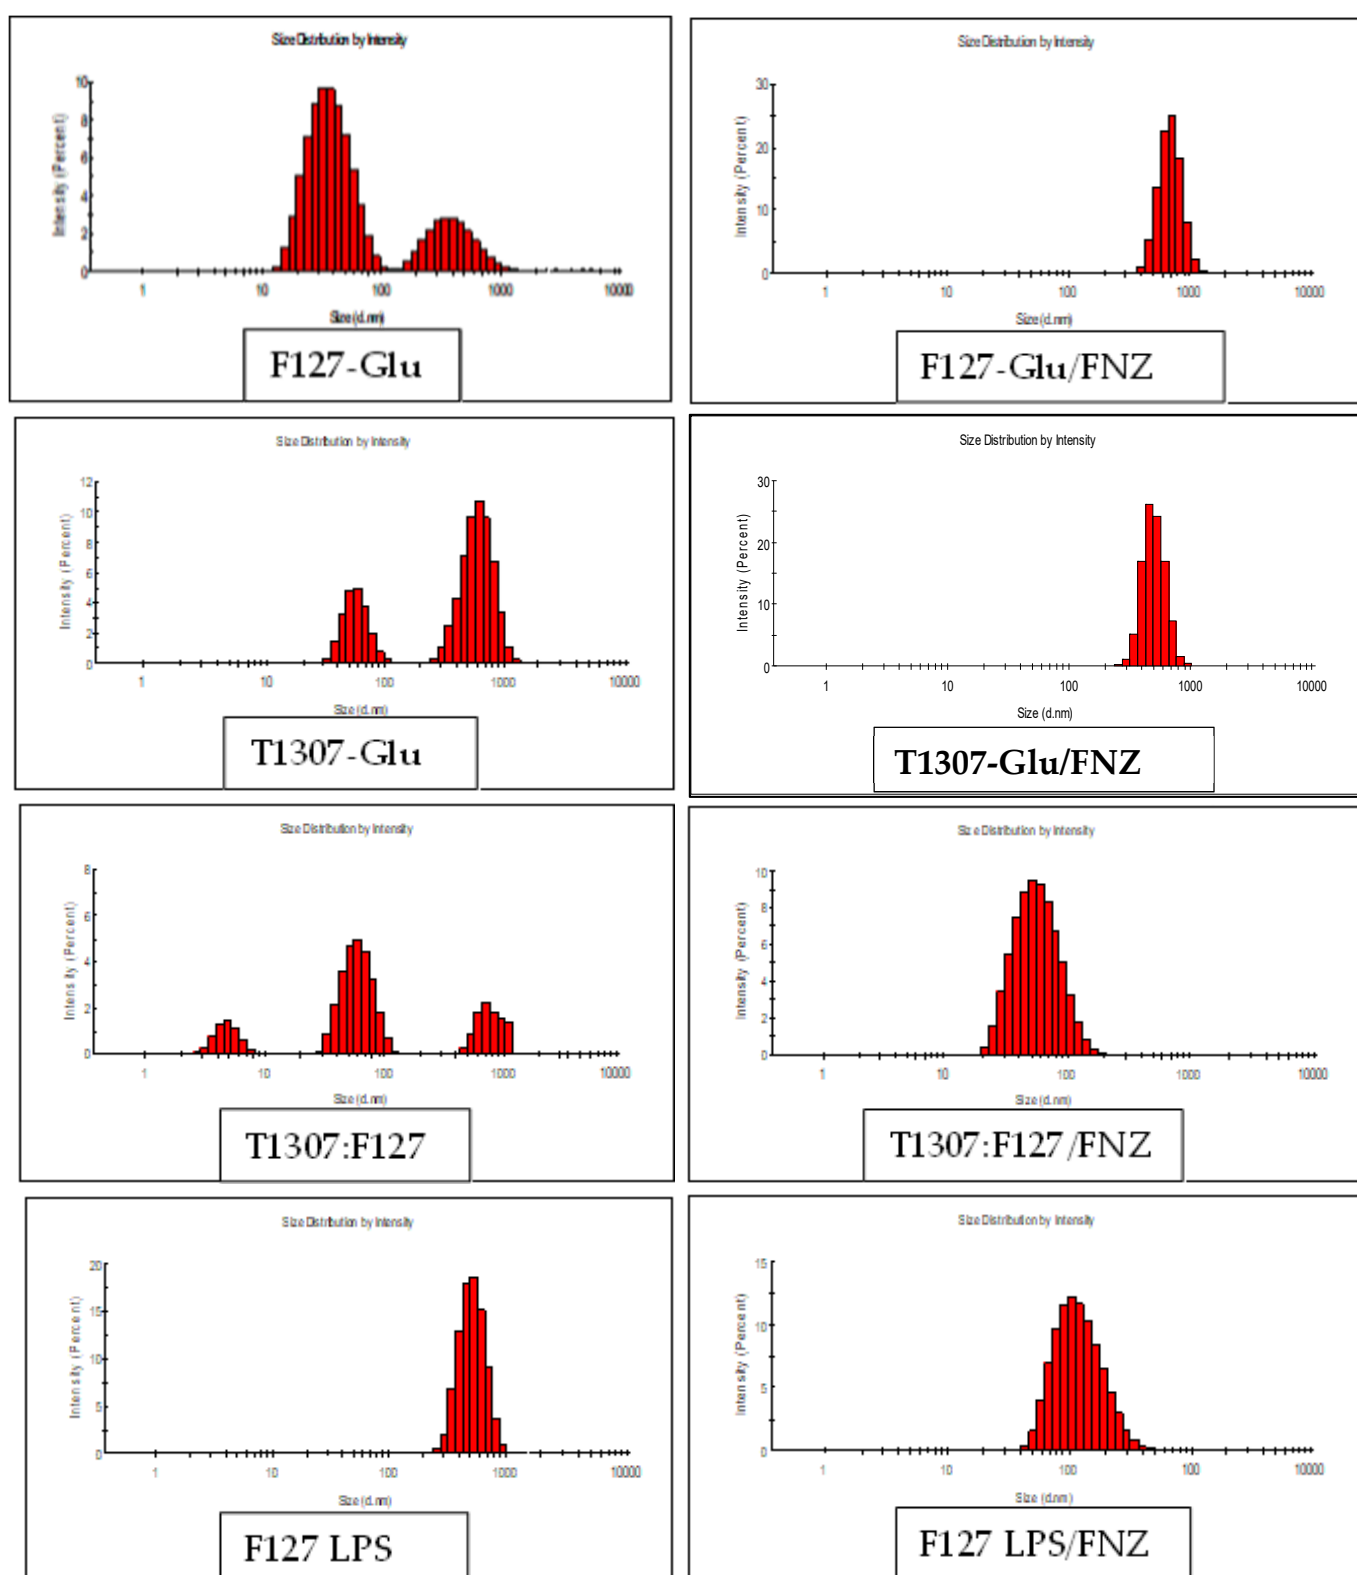

**Figure S2.** Plots of average size distributions obtained by DLS using Zetasizer family software v7.12.

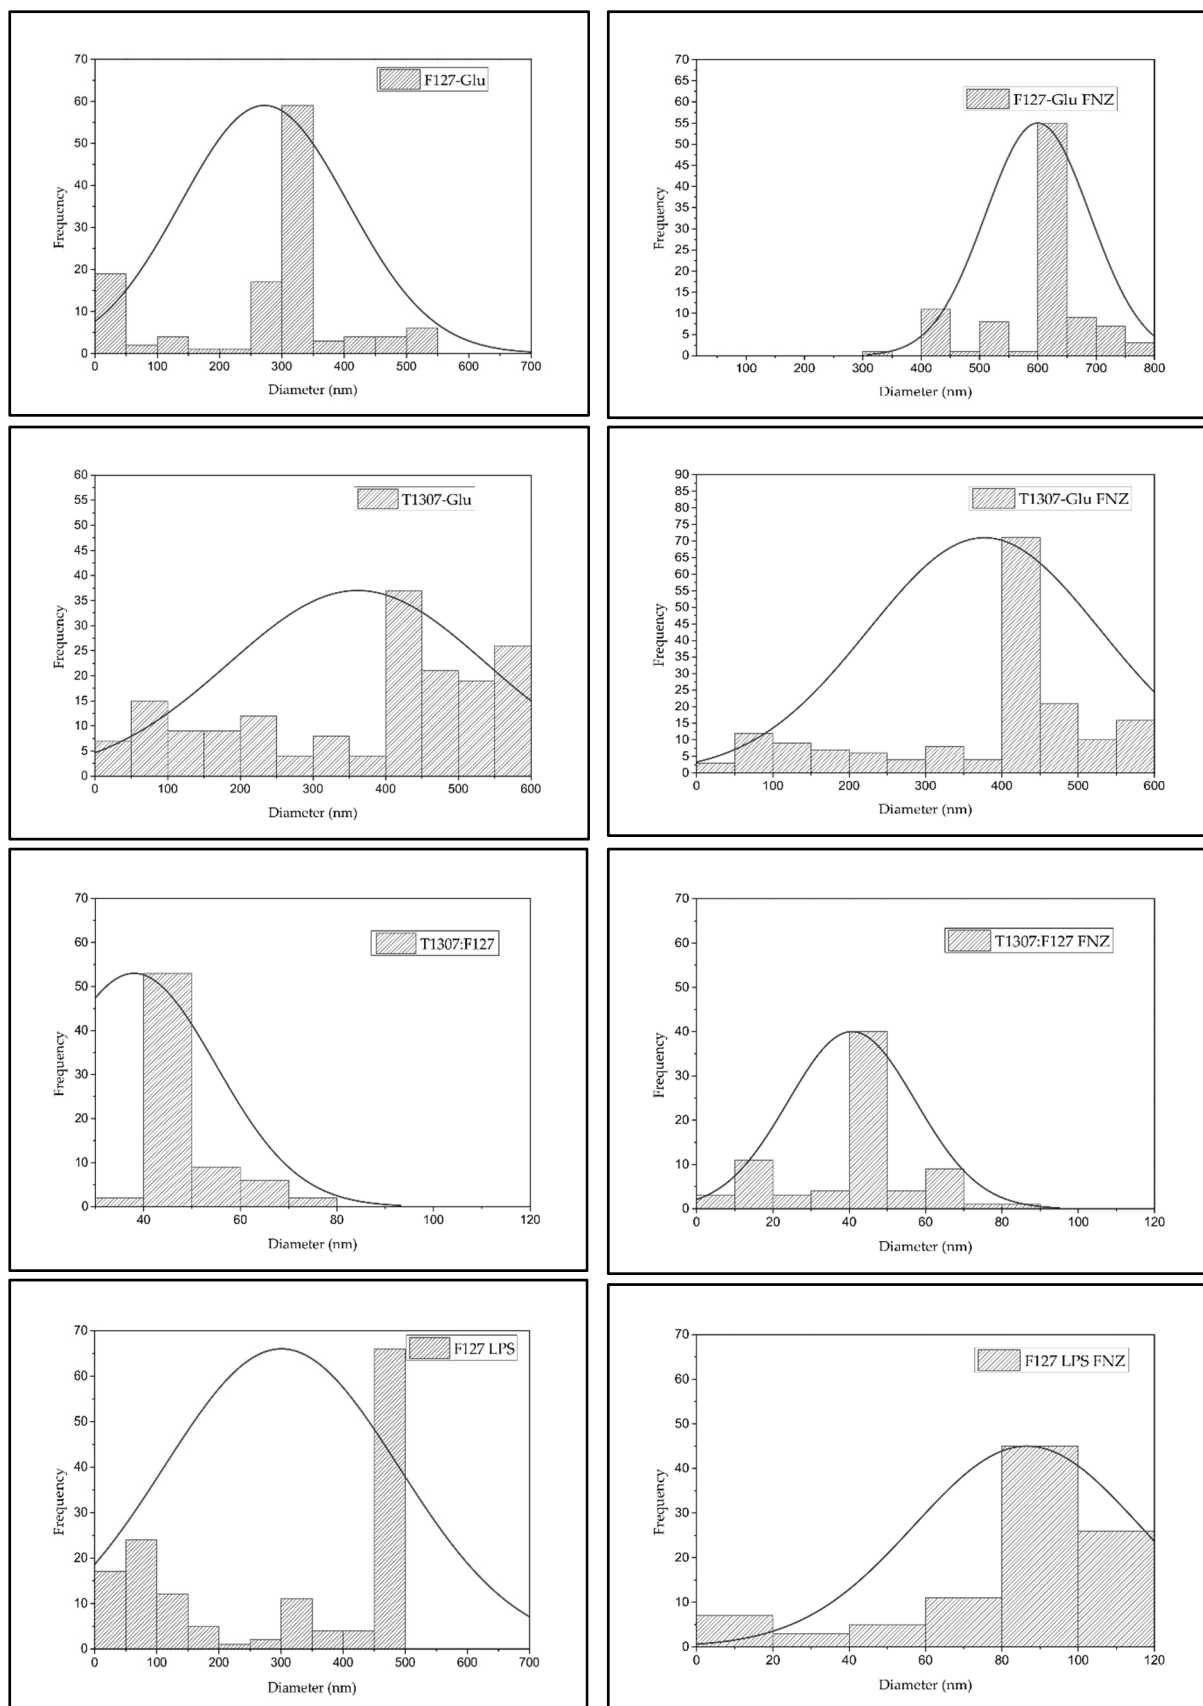

**Figure S3.** Plots of average size distributions obtained by TEM using FIJI platform analysis software.
